# Supplementary material for: Substituent effect on the boron atoms in boron-bridged hexazenes
Source: Royal Society of Chemistry journal article supplement (doi:10.1039/d5dt02896e), 2026-01-01
Supplement: d5dt02896e1.pdf [file d5dt02896e1.pdf]

# **Substituent Effect on the Boron Atoms in Boron-Bridged Hexazenes**

Masahiro Yamamoto, and Makoto Yamashita\*

## **Table of Contents**

|                                                |            |
|------------------------------------------------|------------|
| <b>1. Experimental Procedures</b>              | <b>S2</b>  |
| <b>2. X-ray Crystallographic Analysis</b>      | <b>S10</b> |
| <b>3. Absorption Spectra</b>                   | <b>S14</b> |
| <b>4. Cyclic Voltammetry</b>                   | <b>S15</b> |
| <b>5. Computational Study</b>                  | <b>S16</b> |
| <b>6. Study for the Stability of Compounds</b> | <b>S25</b> |
| <b>7. References</b>                           | <b>S26</b> |

# 1. Experimental Procedures

## General

All manipulations involving the air- and moisture-sensitive compounds were carried out under an argon atmosphere using standard Schlenk and glovebox (Korea KIYON, Korea and ALS Technology, Japan) technique. Dry dichloromethane, Et<sub>2</sub>O, and hexane were purified by passing through a solvent purification system (Glass Contour). **1** was synthesized by using the procedures reported in the literature.<sup>30</sup> CDCl<sub>3</sub> (Kanto), trifluoromethanesulfonic acid (TCI), tetrabutylammonium chloride (TCI), and methylmagnesium bromide (Sigma-Aldrich) were purchased and used as received. The nuclear magnetic resonance (NMR) spectra were recorded on a JEOL ECS-400 [399 MHz for <sup>1</sup>H, 128 MHz for <sup>11</sup>B{<sup>1</sup>H}, 100 MHz for <sup>13</sup>C{<sup>1</sup>H}] spectrometers. Melting points were determined on the Optimelt (SRS) without compensation. Elemental analyses were performed on a Perkin-Elmer 2400 series II CHN analyzer. UV-vis absorption spectra were recorded on a Shimadzu UV-3600 spectrometer. Emission spectra were recorded on a JASCO FP-8200 spectrometer, and absolute fluorescence quantum yields were measured by the photon-counting method using an integration sphere on a JASCO FP-6500 or HAMAMATSU Quantaurus-QY spectrometer. Electrochemical measurements were performed using an ALS 600D potentiostat/galvanostat.

## Synthesis of **2**

In a 2000 mL three-neck flask under argon atmosphere, trifluoromethanesulfonic acid (2.11 mL, 24.0 mmol) was added to a solution of **1** (3.92 g, 6.00 mmol) in dry dichloromethane (600 mL) at room temperature. After the reaction mixture was stirred at room temperature for 16 h, the reaction mixture was concentrated to ca. 20 mL under reduced pressure. The concentrated solution was added dropwise to hexane (1.0 L) in a 1 L flask under stirring. The resulting mixture was filtered through a filter paper, and the filtrate was concentrated under reduced pressure to afford a light-yellow solid of **2** (4.14 g, 4.68 mmol, 78%).

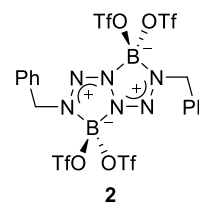

<sup>1</sup>H NMR (399 MHz, CDCl<sub>3</sub>) δ 7.46–7.39 (m, 6H, Ar-H), 7.38–7.33 (m, 4H, Ar-H), 5.25 (s, 4H, NCH<sub>2</sub>); <sup>11</sup>B{<sup>1</sup>H} NMR (128 MHz, CDCl<sub>3</sub>) δ -2 (s); <sup>13</sup>C{<sup>1</sup>H} NMR (100 MHz, CDCl<sub>3</sub>) δ 130.30 (Ar-CH), 129.86 (Ar-C), 129.67 (Ar-CH), 129.44 (Ar-CH), 118.04 (q, J = 319 Hz), 57.11 (NCH<sub>2</sub>); <sup>19</sup>F{<sup>1</sup>H} NMR (376 MHz, CDCl<sub>3</sub>) δ -75.79 (s), Anal. Calcd. for C<sub>18</sub>H<sub>14</sub>B<sub>2</sub>F<sub>12</sub>N<sub>6</sub>O<sub>12</sub>S<sub>4</sub>: C, 24.45; H, 1.60; N, 9.51; Found: C, 24.71; H, 1.42; N, 9.19; mp: 87–91 °C (decomp.).

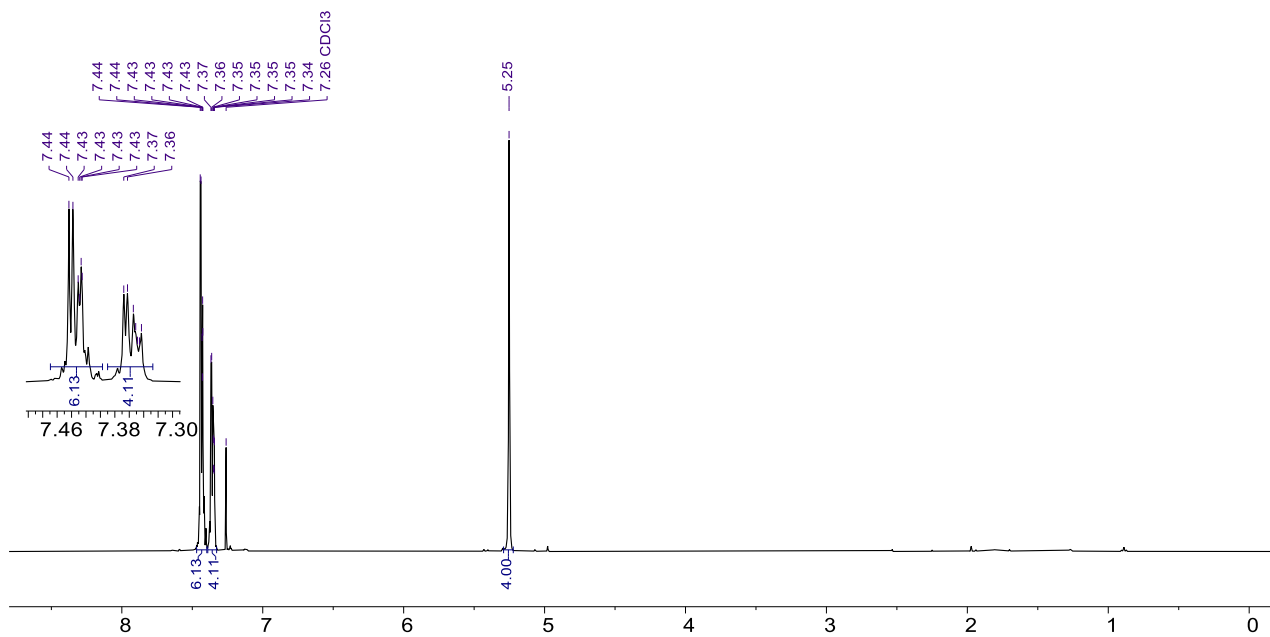

**Figure S1.** The <sup>1</sup>H NMR spectrum of **2** in CDCl<sub>3</sub>.

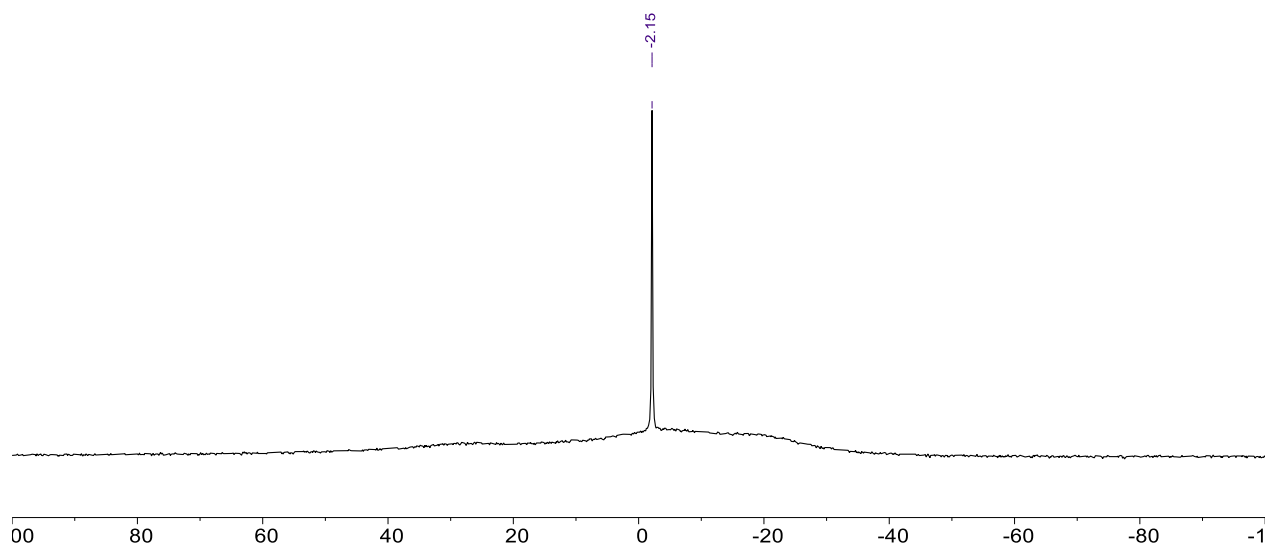

**Figure S2.** The <sup>11</sup>B{<sup>1</sup>H} NMR spectrum of **2** in CDCl<sub>3</sub>.

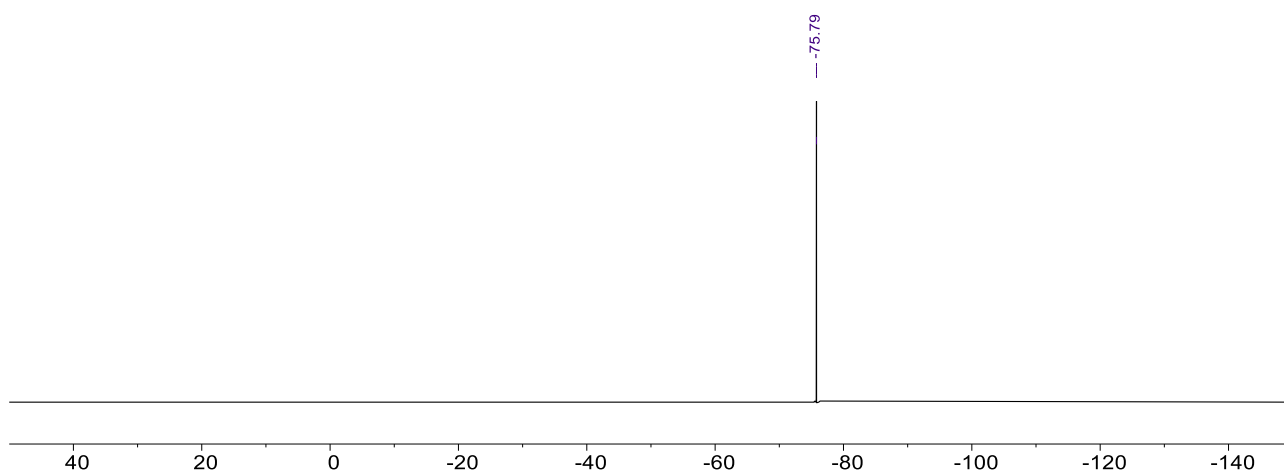

**Figure S3.** The <sup>19</sup>F{<sup>1</sup>H} NMR spectrum of **2** in CDCl<sub>3</sub>.

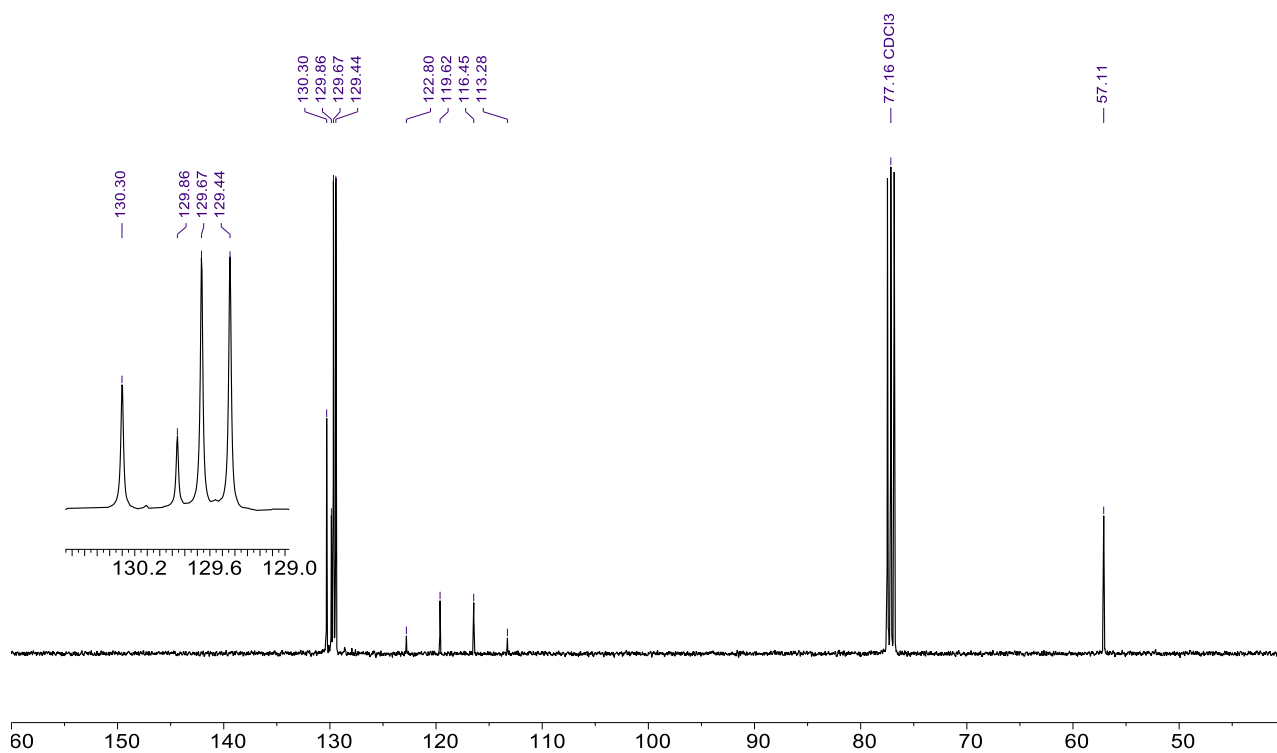

**Figure S4.** The  $^{13}\text{C}\{^1\text{H}\}$  NMR spectrum of **2** in  $\text{CDCl}_3$ .

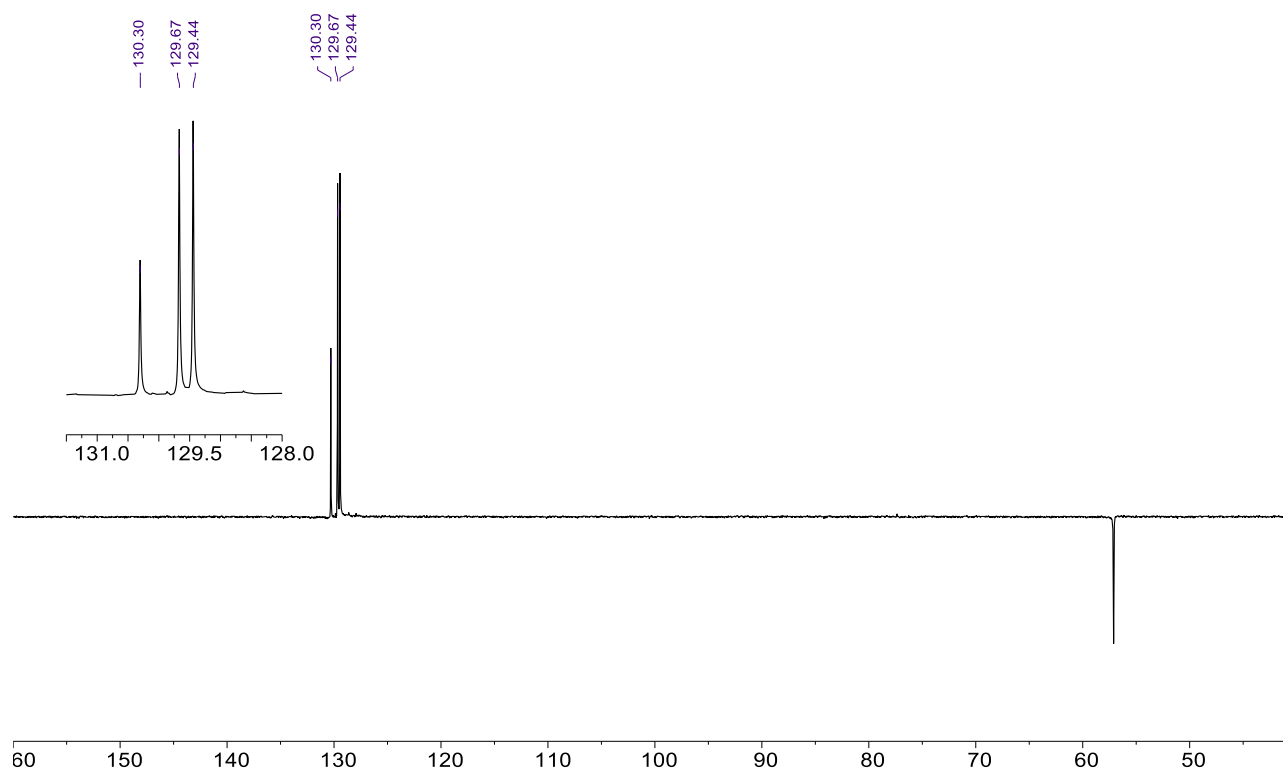

**Figure S5.** The  $^{13}\text{C}\{^1\text{H}\}$  DEPT-135 NMR spectrum of **2** in  $\text{CDCl}_3$ .

## Synthesis of 3

In a 100 mL Schlenk flask under argon atmosphere, a solution of **2** (3.54 g, 4.00 mmol) in dry dichloromethane (10 mL) was added dropwise to a solution of tetrabutylammonium chloride (4.45 g, 16.0 mmol) in dry dichloromethane (10 mL) at room temperature. After stirring the reaction mixture for 16 h at room temperature, it was purified by passing through a short pad of silica-gel. The filtrate was concentrated under reduced pressure, and the residue was recrystallized from dichloromethane to afford light yellow crystals of **3** (1.22 g, 2.84 mmol, 71%).

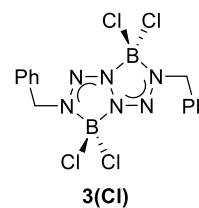

$^1\text{H}$  NMR (399 MHz,  $\text{CDCl}_3$ )  $\delta$  7.45–7.36 (m, 10H, Ar-*H*), 5.11 (s, 4H,  $\text{NCH}_2$ );  $^{11}\text{B}\{^1\text{H}\}$  NMR (128 MHz,  $\text{CDCl}_3$ )  $\delta$  2 (s);  $^{13}\text{C}\{^1\text{H}\}$  NMR (100 MHz,  $\text{CDCl}_3$ )  $\delta$  132.66 (Ar-C), 129.52 (Ar-CH), 129.40 (Ar-CH), 129.22 (Ar-CH), 54.78 ( $\text{NCH}_2$ ); Anal. Calcd. for  $\text{C}_{14}\text{H}_{14}\text{B}_2\text{Cl}_4\text{N}_6$ : C, 39.13; H, 3.28; N, 19.56; Found: C, 39.19; H, 3.55; N, 19.81; mp: 169–173 °C (decomp.).

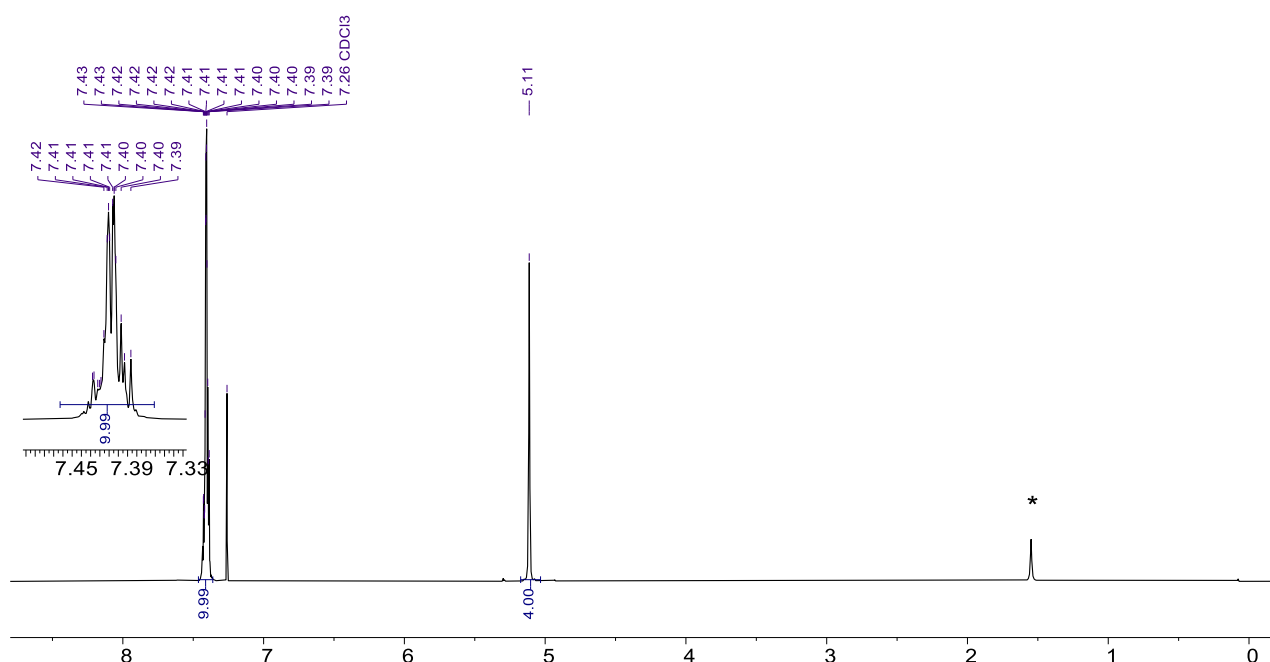

**Figure S6.** The  $^1\text{H}$  NMR spectrum of **3** in  $\text{CDCl}_3$  (\*:  $\text{H}_2\text{O}$ ).

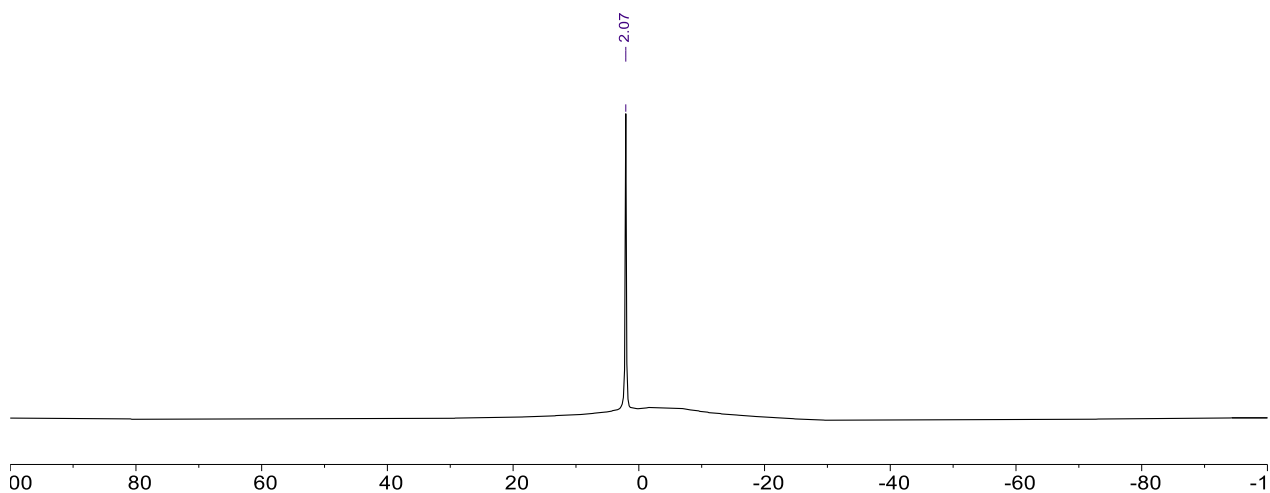

**Figure S7.** The  $^{11}\text{B}\{^1\text{H}\}$  NMR spectrum of **3** in  $\text{CDCl}_3$ .

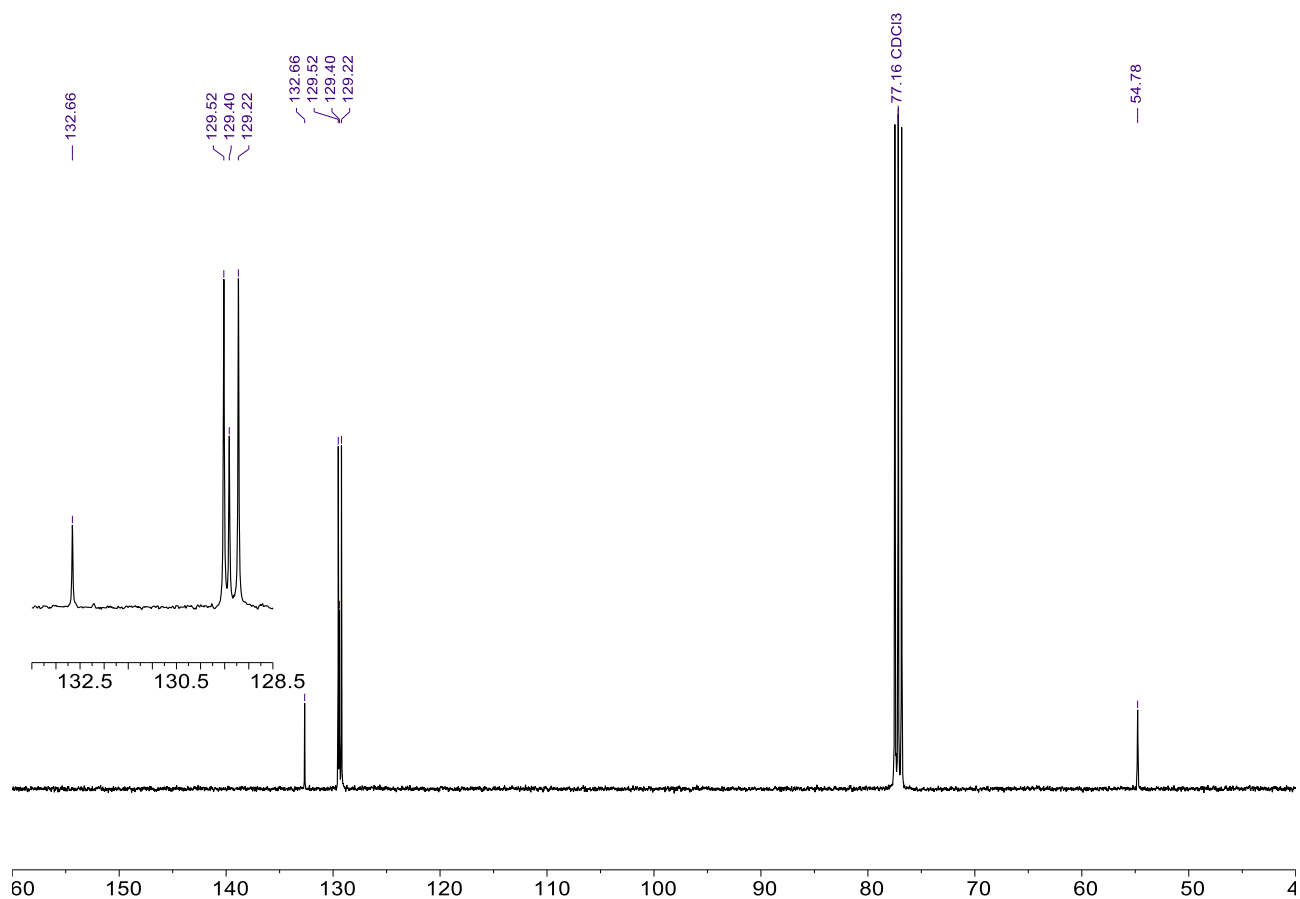

**Figure S8.** The  $^{13}\text{C}\{^1\text{H}\}$  NMR spectrum of **3** in  $\text{CDCl}_3$ .

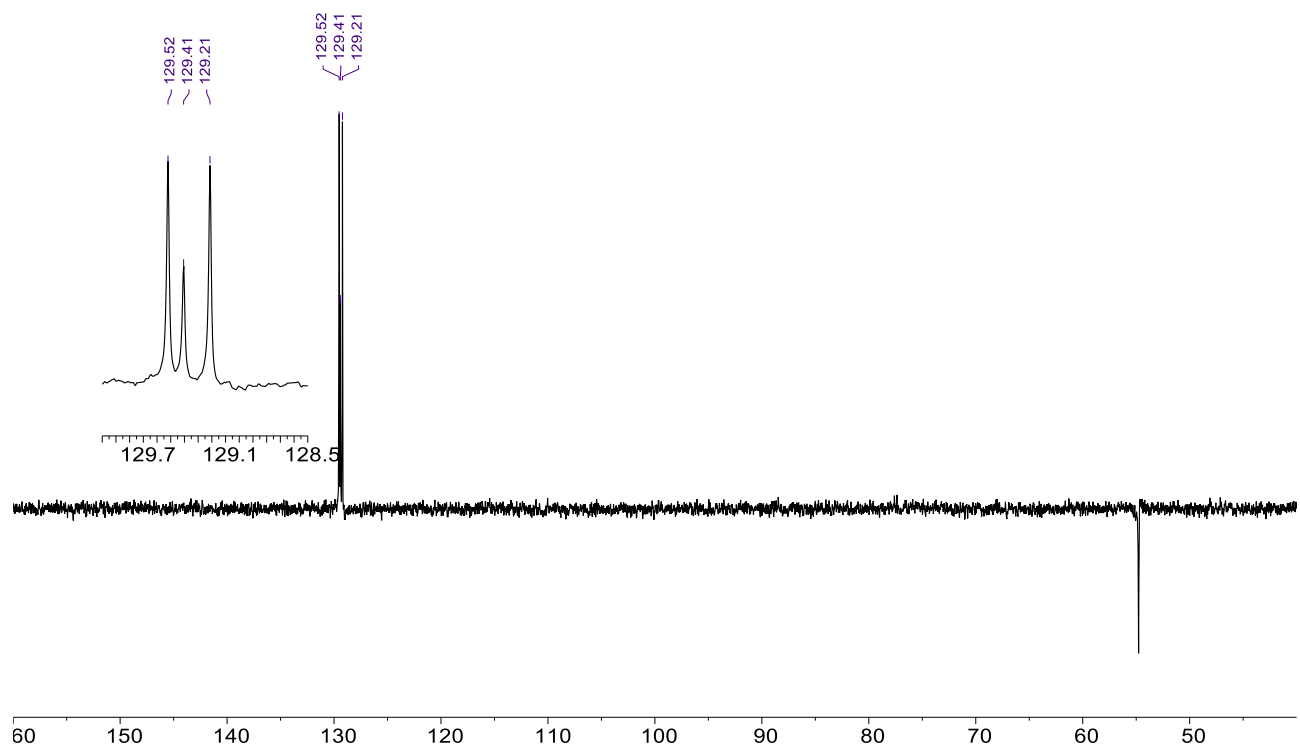

**Figure S9.** The  $^{13}\text{C}\{^1\text{H}\}$  DEPT-135 NMR spectrum of **3** in  $\text{CDCl}_3$ .

## Synthesis of **4**

**Method A:** In a 50 mL Schlenk flask under argon atmosphere, a solution of **2** (1.77 g, 2.00 mmol) in dry hexane (20 mL) was added dropwise to a solution of AlMe<sub>3</sub> in hexane (1.4 M, 6.00 mL, 8.40 mmol) at –78°C using a dry ice/acetone bath. The mixture was then warmed to room temperature and stirred for 16 h. The reaction was quenched with water, and the mixture was extracted with hexane. The combined organic layer was dried over Na<sub>2</sub>SO<sub>4</sub> and filtered through a filter paper. The filtrate was concentrated using a rotary evaporator, and the residue was recrystallized from dichloromethane to afford fluorescent yellow crystals of **4** (522 mg, 1.50 mmol, 75%).

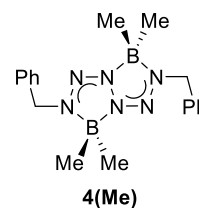

**Method B:** In a 10 mL Schlenk flask under argon atmosphere, a solution of MeMgBr in diethyl ether (3.0 M, 134 µL, 401 µmol) was added dropwise to a solution of **3** (42.9 mg, 100 µmol) in dry diethyl ether (3.0 mL) at –78°C using a dry ice/acetone bath. The mixture was then warmed to room temperature and stirred for 16 h. Volatiles were removed from the reaction mixture under reduced pressure. The residue was purified by passing through a short pad of silica-gel, and the filtrate was concentrated to afford a fluorescent yellow solid of **4** (28.3 mg, 81.3 µmol, 81%).

<sup>1</sup>H NMR (399 MHz, CDCl<sub>3</sub>) δ 7.36–7.26 (m, 10H, Ar-*H*), 4.73 (s, 4H, NCH<sub>2</sub>), –0.13 (s, 4H, BCH<sub>3</sub>); <sup>11</sup>B{<sup>1</sup>H} NMR (128 MHz, CDCl<sub>3</sub>) δ 1 (s); <sup>13</sup>C{<sup>1</sup>H} NMR (100 MHz, CDCl<sub>3</sub>) δ 136.38 (Ar-C), 128.72 (Ar-CH), 128.61 (Ar-CH), 128.10 (Ar-CH), 54.26 (NCH<sub>2</sub>), 6.94 (BCH<sub>3</sub>); Anal. Calcd. for C<sub>18</sub>H<sub>26</sub>B<sub>2</sub>N<sub>6</sub>: C, 62.11; H, 7.53; N, 24.15; Found: C, 62.06; H, 7.54; N, 24.00; mp: 111–115 °C (decomp.).

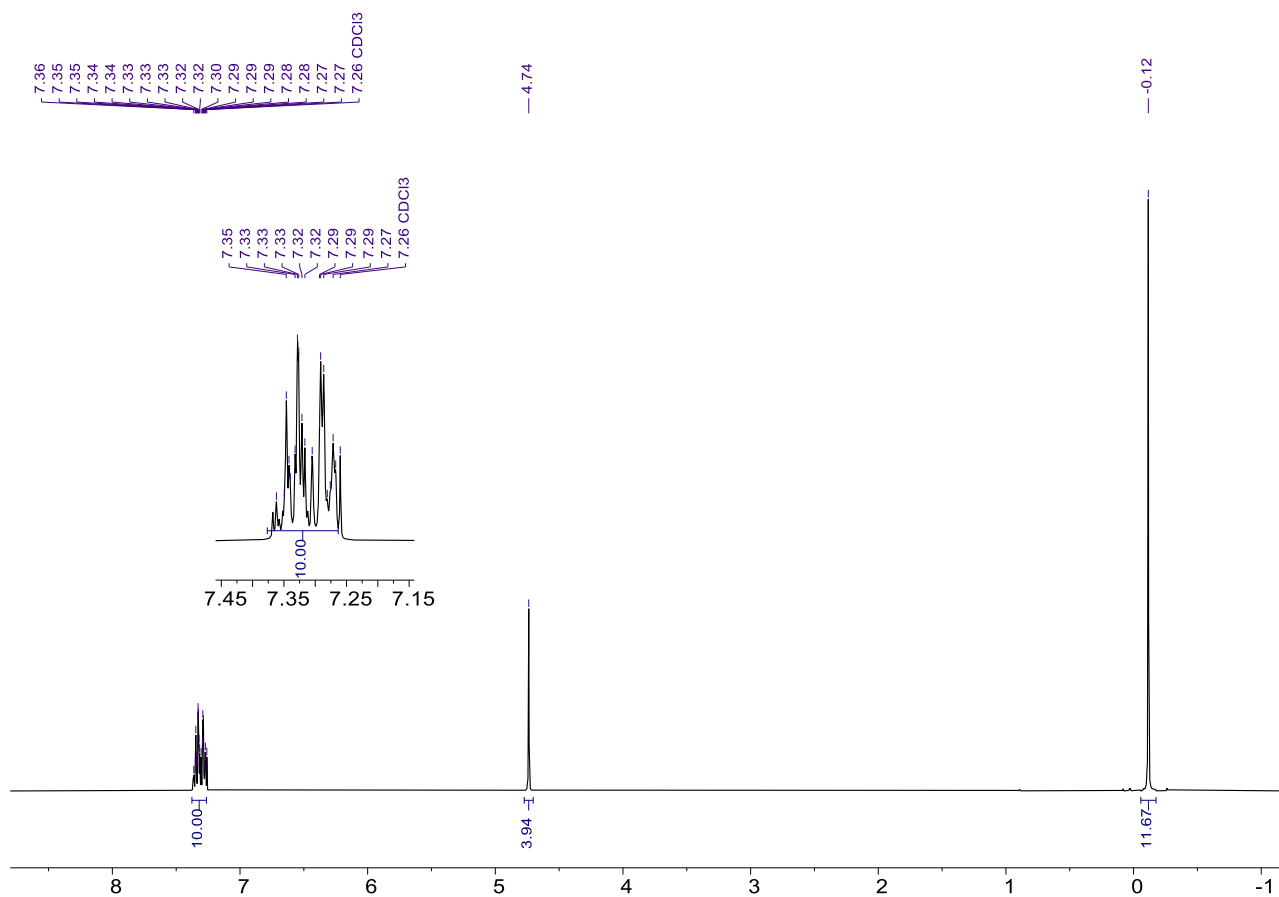

**Figure S10.** The <sup>1</sup>H NMR spectrum of **4** in CDCl<sub>3</sub>.

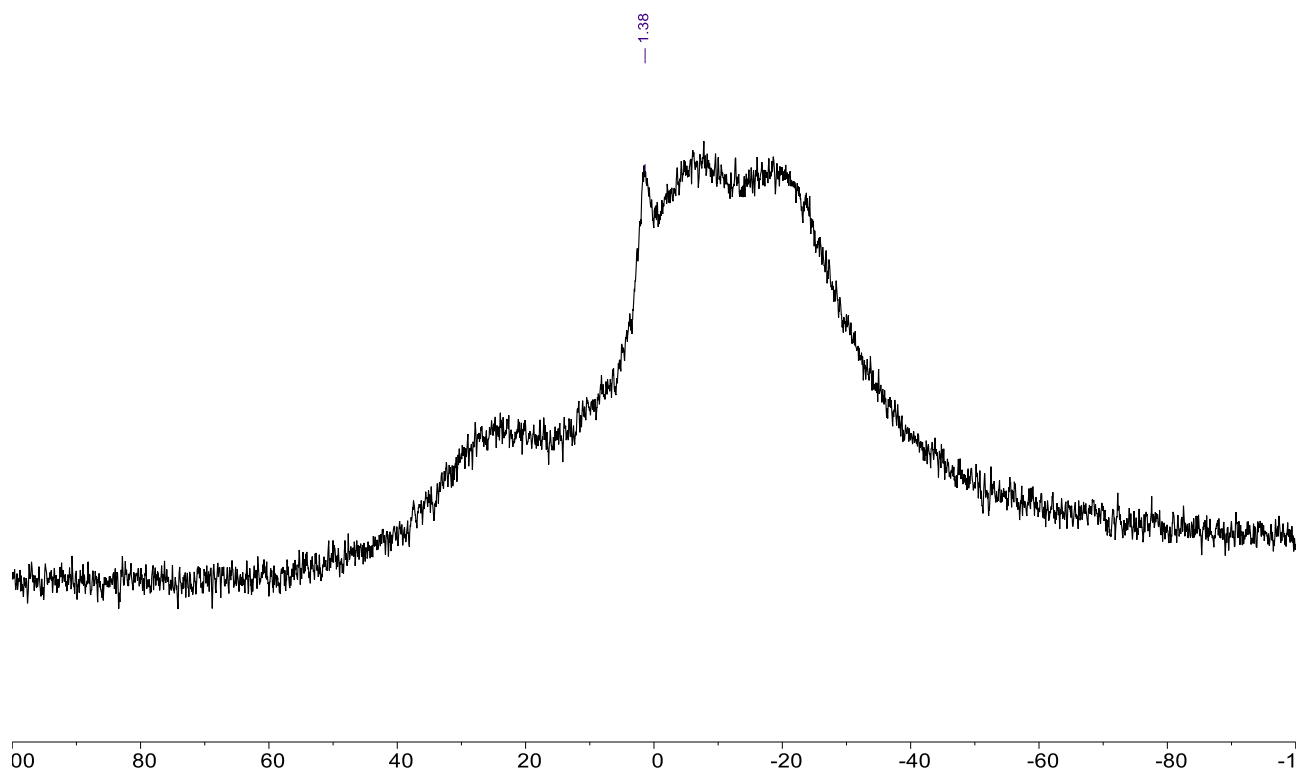

**Figure S11.** The <sup>11</sup>B{<sup>1</sup>H} NMR spectrum of **4** in CDCl<sub>3</sub>.



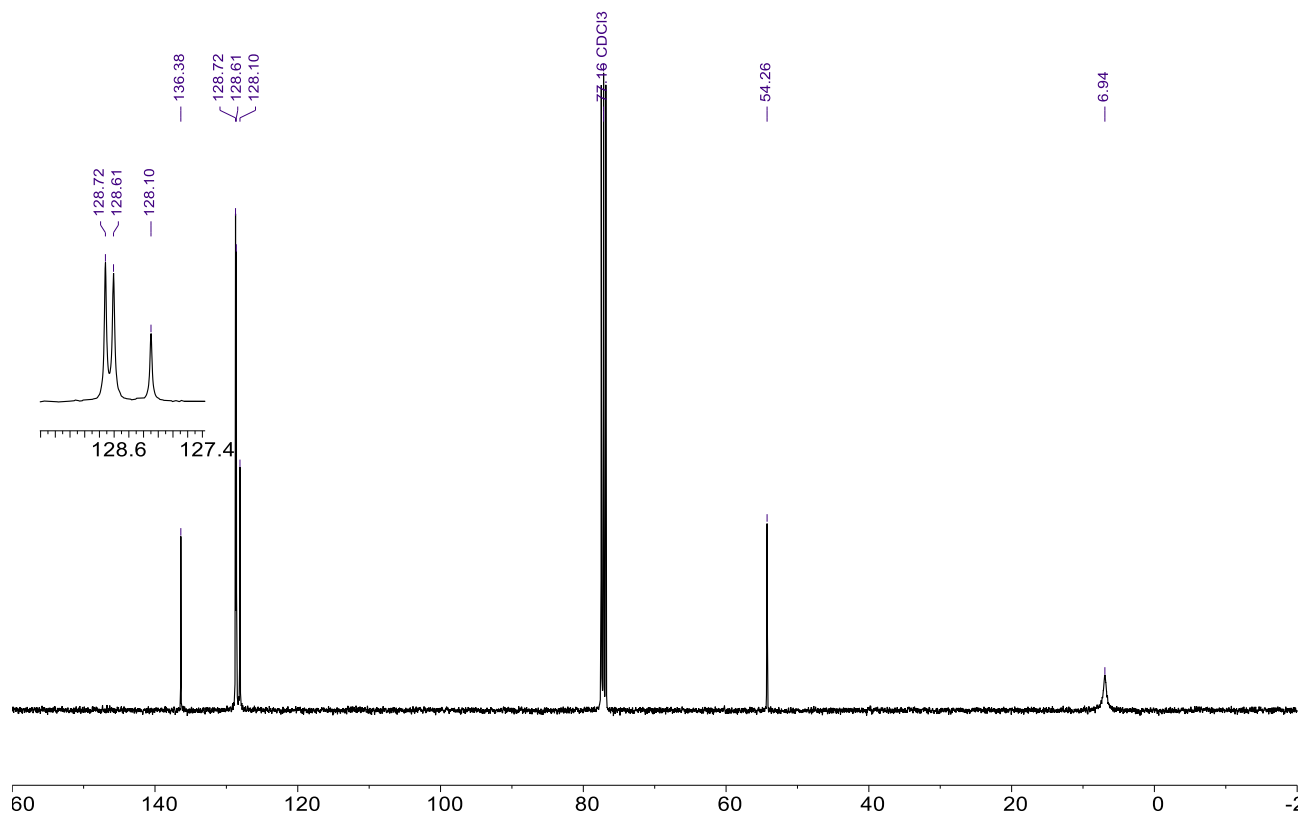

**Figure S12.** The  $^{13}\text{C}\{^1\text{H}\}$  NMR spectrum of **4** in  $\text{CDCl}_3$ .

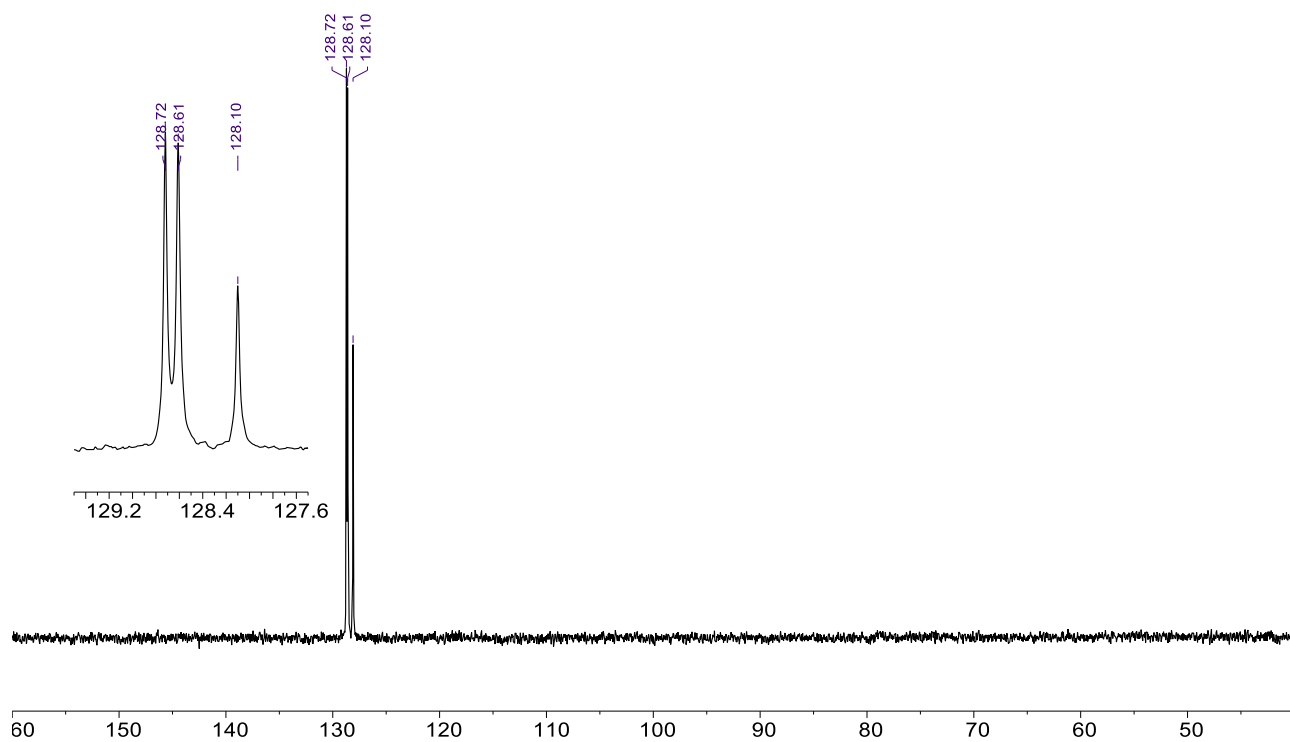

**Figure S13.** The  $^{13}\text{C}\{^1\text{H}\}$  DEPT-135 NMR spectrum of **4** in  $\text{CDCl}_3$ .

## 2. Details for X-ray Crystallography

Crystallographic data for **2**, **3**, and **4** are listed in **Table S1**. The crystals were coated with immersion oil, put on a MicroMount<sup>TM</sup> (MiTeGen, LLC), and then mounted on a diffractometer. Diffraction data were collected on a Rigaku HyPix-6000 detector using MoK $\alpha$  radiation. The Bragg spots were integrated using the CrysAlisPro program package.<sup>35</sup> All the following procedures for analysis, Olex 2.0<sup>36</sup> and Yadokari-XG 2009<sup>37</sup> were used as a graphical interface. The structures were solved by direct methods using SHELXL-2018<sup>38</sup> and refined by full-matrix least-squares using SHELXL-2018.<sup>38</sup> Anisotropic temperature factors were applied to all non-hydrogen atoms. The hydrogen atoms were placed at calculated positions and refined by applying riding models. The detailed crystallographic data have been deposited with the Cambridge Crystallographic Data Centre with deposition code CCDC 2512981-2512983. A combined CIF file for the data can be obtained free of charge via <http://www.ccdc.cam.ac.uk/products/csd/request>.

**Table S1.** Crystallographic data and structure refinement details for **2**, **3**, and **4**

| compound #                                                                          | <b>2</b>                                                                                                     | <b>3</b>                                                                      | <b>4</b>                                                      |
|-------------------------------------------------------------------------------------|--------------------------------------------------------------------------------------------------------------|-------------------------------------------------------------------------------|---------------------------------------------------------------|
| CCDC deposit #                                                                      | 2512981                                                                                                      | 2512982                                                                       | 2512983                                                       |
| Empirical formula                                                                   | C <sub>18</sub> H <sub>14</sub> B <sub>2</sub> N <sub>6</sub> O <sub>12</sub> F <sub>12</sub> S <sub>4</sub> | C <sub>14</sub> H <sub>14</sub> B <sub>2</sub> N <sub>6</sub> Cl <sub>4</sub> | C <sub>18</sub> H <sub>26</sub> B <sub>2</sub> N <sub>6</sub> |
| Formula weight                                                                      | 884.18                                                                                                       | 429.73                                                                        | 348.07                                                        |
| <i>T</i> (K)                                                                        | 93(2)                                                                                                        | 93(2)                                                                         | 93(2)                                                         |
| $\lambda$ (Å)                                                                       | 0.71073                                                                                                      | 0.71075                                                                       | 0.71075                                                       |
| Crystal system                                                                      | <i>Monoclinic</i>                                                                                            | <i>Triclinic</i>                                                              | <i>Monoclinic</i>                                             |
| Space group                                                                         | <i>C2/c</i>                                                                                                  | <i>P-1</i>                                                                    | <i>P2<sub>1</sub>/n</i>                                       |
| <i>a</i> (Å)                                                                        | 23.1108(8)                                                                                                   | 9.510(5)                                                                      | 11.046(2)                                                     |
| <i>b</i> (Å)                                                                        | 16.0696(5)                                                                                                   | 10.265(5)                                                                     | 6.4077(13)                                                    |
| <i>c</i> (Å)                                                                        | 17.3591(6)                                                                                                   | 11.092(6)                                                                     | 13.815(3)                                                     |
| $\alpha$ (°)                                                                        | 90°                                                                                                          | 95.1397(11)                                                                   | 90                                                            |
| $\beta$ (°)                                                                         | 92.189(3)                                                                                                    | 108.318(6)                                                                    | 101.687(6)                                                    |
| $\gamma$ (°)                                                                        | 90°                                                                                                          | 109.543(6)                                                                    | 90                                                            |
| <i>V</i> (Å <sup>3</sup> )                                                          | 6442.1(4)                                                                                                    | 945.5(9)                                                                      | 957.5(3)                                                      |
| <i>Z</i>                                                                            | 8                                                                                                            | 2                                                                             | 2                                                             |
| <i>D</i> <sub>calc</sub> , (g/m <sup>3</sup> )                                      | 1.823                                                                                                        | 1.509                                                                         | 1.207                                                         |
| $\mu$ (mm <sup>-1</sup> )                                                           | 0.432                                                                                                        | 0.637                                                                         | 0.074                                                         |
| <i>F</i> (000)                                                                      | 3536                                                                                                         | 436                                                                           | 372                                                           |
| crystal size (mm)                                                                   | 0.14×0.12×0.08                                                                                               | 0.15×0.03×0.02                                                                | 0.15×0.12×0.05                                                |
| 2 $\theta$ range (°)                                                                | 1.764–30.753                                                                                                 | 3.232–27.460                                                                  | 3.518–27.458                                                  |
| index ranges                                                                        | –32≤ <i>h</i> ≤23,<br>–20≤ <i>k</i> ≤21,<br>–23≤ <i>l</i> ≤20                                                | –12≤ <i>h</i> ≤12,<br>–13≤ <i>k</i> ≤13,<br>–14≤ <i>l</i> ≤14                 | –14≤ <i>h</i> ≤14,<br>–8≤ <i>k</i> ≤8,<br>–15≤ <i>l</i> ≤17   |
| reflns collected                                                                    | 24691                                                                                                        | 9687                                                                          | 7850                                                          |
| Indep reflns/ <i>R</i> <sub>int</sub>                                               | 7993/0.0480                                                                                                  | 4232/0.0560                                                                   | 2171/0.0610                                                   |
| parameters                                                                          | 532                                                                                                          | 235                                                                           | 120                                                           |
| GOF on <i>F</i> <sup>2</sup>                                                        | 1.014                                                                                                        | 1.006                                                                         | 1.054                                                         |
| <i>R</i> <sub>1</sub> , <i>wR</i> <sub>2</sub> [ <i>I</i> >2 $\sigma$ ( <i>I</i> )] | 0.0482, 0.0917                                                                                               | 0.0448, 0.0875                                                                | 0.0476, 0.1030                                                |
| <i>R</i> <sub>1</sub> , <i>wR</i> <sub>2</sub> (all data)                           | 0.0835, 0.1007                                                                                               | 0.0861, 0.1009                                                                | 0.0740, 0.1143                                                |
| $\Delta\rho_{\min, \max}$ / e Å <sup>-3</sup>                                       | 0.369, –0.433                                                                                                | 0.394, –0.314                                                                 | 0.221, –0.243                                                 |

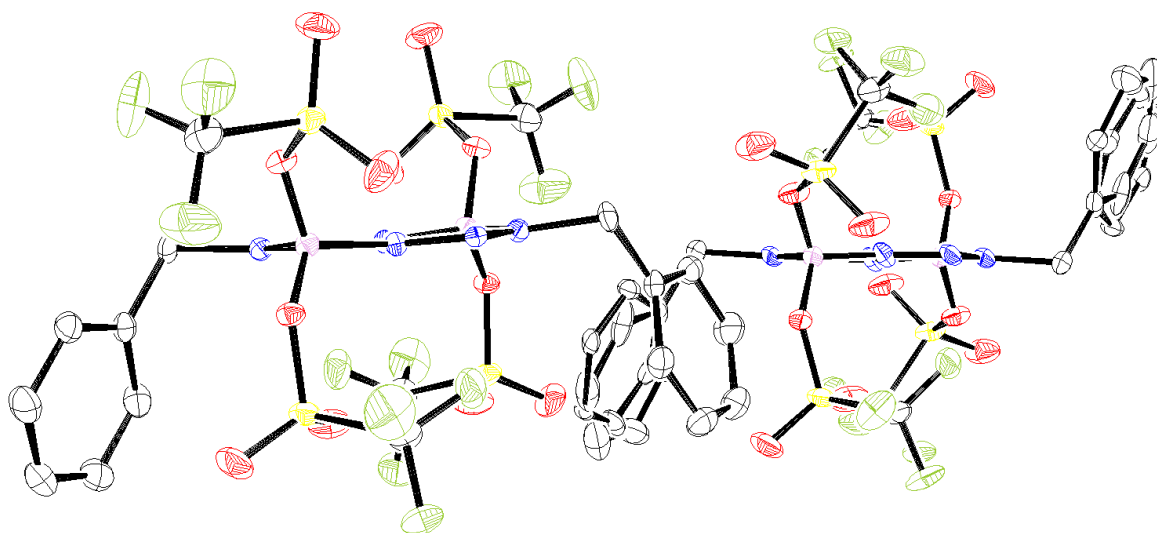

**Figure S14.** Molecular structure of **2** with two benzyl conformers in the crystal. (Thermal ellipsoids at 50% probability. Hydrogen atoms are omitted for clarity. Two independent molecules are shown.)

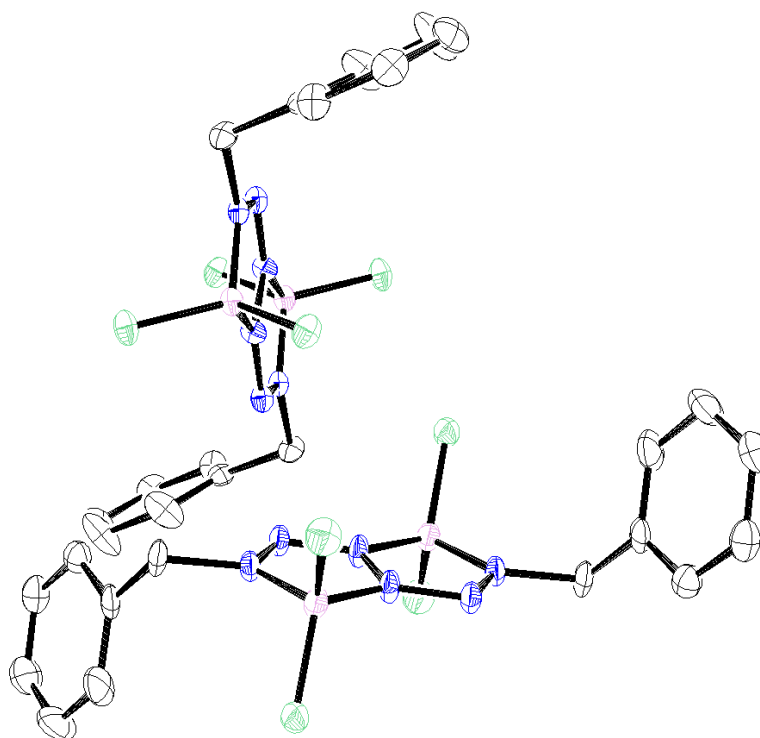

**Figure S15.** Molecular structure of **3** in the crystal (Thermal ellipsoids at 50% probability. Hydrogen atoms are omitted for clarity. Two independent molecules are shown.)

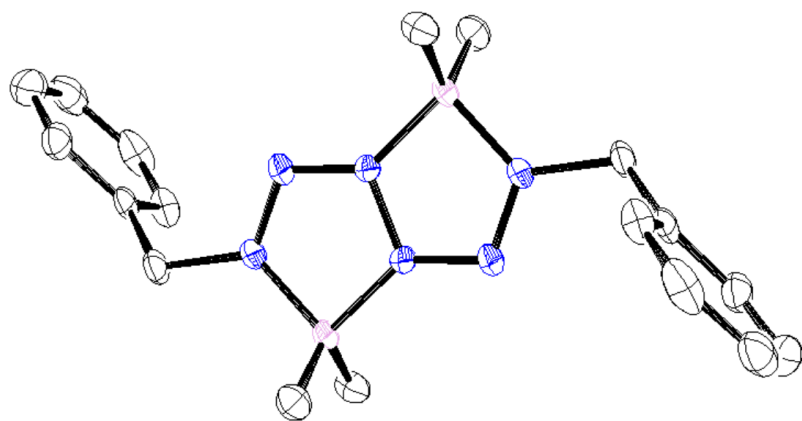

**Figure S16.** Molecular structure of **4** in the crystal (Thermal ellipsoids at 50% probability. Hydrogen atoms are omitted for clarity.)

### 3. Absorption Spectra

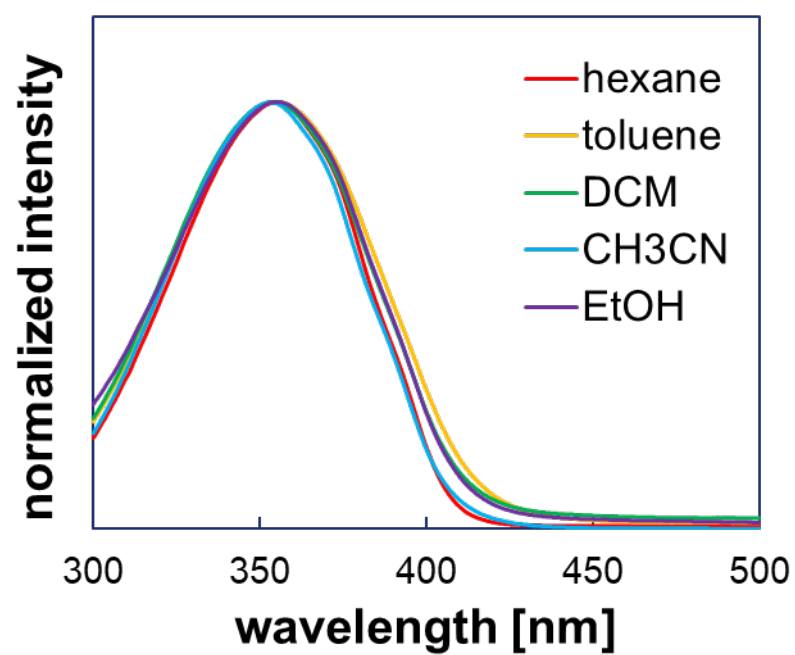

**Figure S17.** UV–vis absorption spectra of **2** (50.0  $\mu\text{M}$ ) at room temperature in hexane, toluene, dichloromethane, acetonitrile, and ethanol.

## 4. Cyclic Voltammetry

Cyclic voltammetry (CV) of **1** – **4** (2.00 mM each) was carried out in dry dichloromethane under ambient air at room temperature, using  $^n\text{Bu}_4\text{NPF}_6$  (0.10 M) as the supporting electrolyte. A glassy carbon disk working electrode, a platinum wire counter electrode, and an Ag/Ag<sup>+</sup> reference electrode were employed with the scan rate of 50 mV s<sup>-1</sup>. All potentials were referenced to the Cp<sub>2</sub>Fe/Cp<sub>2</sub>Fe<sup>+</sup> (Fc/Fc<sup>+</sup>) redox couple at 0.0 V.

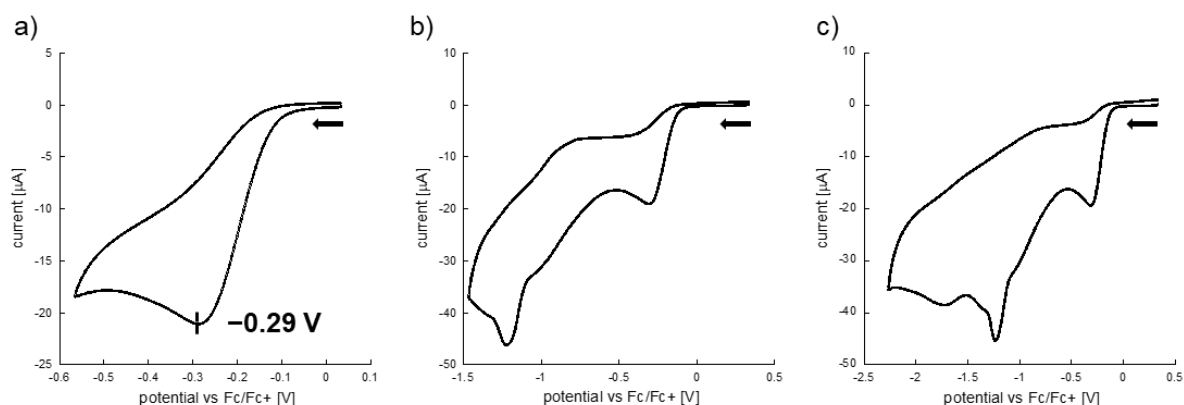

**Figure S18.** Cyclic voltammograms in the reduction range for a 2.00 mM solution of **2** in CH<sub>2</sub>Cl<sub>2</sub>.

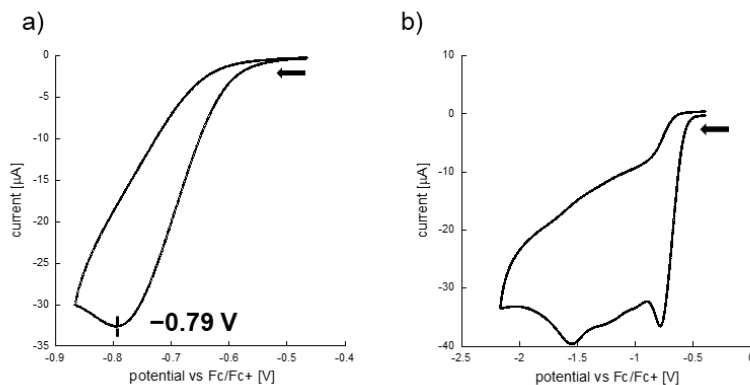

**Figure S19.** Cyclic voltammograms in the reduction range for a 2.00 mM solution of **3** in CH<sub>2</sub>Cl<sub>2</sub>.

## 5. Computational Study

All calculations were performed by using the Gaussian 16 program.<sup>39</sup> The geometry optimization and TD-DFT calculations<sup>40</sup> to estimate UV-vis spectrum of **1**,<sup>33</sup> **2**, **3**, and **4** were performed using the B3LYP<sup>41</sup> functional and the 6-31+G(d) basis set<sup>42</sup> and employing SMD solvation model<sup>43</sup> with dichloromethane as the solvent and empirical dispersion correction (DFT-D3BJ).<sup>44</sup>

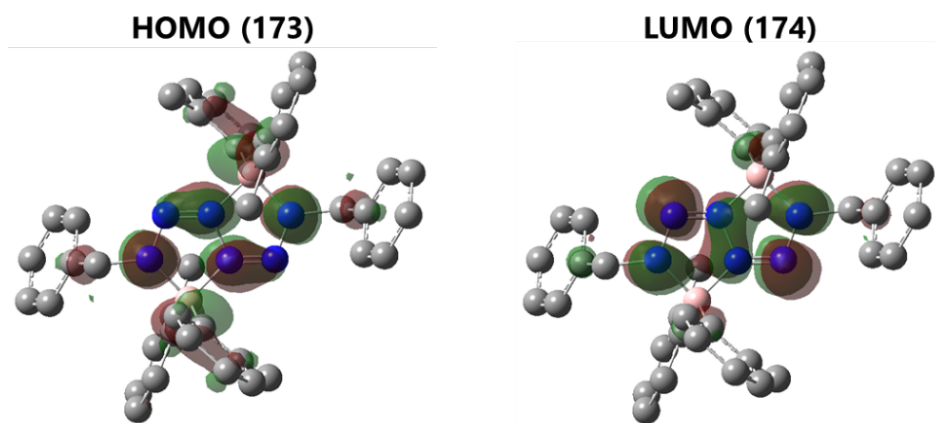

**Figure S20.** Calculated frontier orbitals of **1** (isovalue = 0.03).

**Table S2.** Calculated excitation energies and oscillator strengths for **1** at the B3LYP/6-31+G(d) level of theory.

Excited State 1: Singlet-A 3.0119 eV 411.64 nm  $f=0.3456$   $\langle S^2 \rangle=0.000$   
173  $\rightarrow$  174 0.69626

This state for optimization and/or second-order correction.

Total Energy, E(TD-HF/TD-DFT) = -2003.99654823

Copying the excited state density for this state as the 1-particle RhoCI density.

Excited State 2: Singlet-A 3.3249 eV 372.89 nm  $f=0.0246$   $\langle S^2 \rangle=0.000$   
171  $\rightarrow$  174 0.69399

Excited State 3: Singlet-A 3.3308 eV 372.24 nm  $f=0.0000$   $\langle S^2 \rangle=0.000$   
172  $\rightarrow$  174 0.69974

Excited State 4: Singlet-A 3.4187 eV 362.66 nm  $f=0.0000$   $\langle S^2 \rangle=0.000$   
169  $\rightarrow$  174 0.69804

Excited State 5: Singlet-A 3.4291 eV 361.56 nm  $f=0.0250$   $\langle S^2 \rangle=0.000$   
170  $\rightarrow$  174 0.69941

Excited State 6: Singlet-A 3.5768 eV 346.64 nm  $f=0.0000$   $\langle S^2 \rangle=0.000$   
168  $\rightarrow$  174 0.69731



Excited State 7: Singlet-A 3.5851 eV 345.83 nm  $f=0.0131$   $\langle S^2 \rangle=0.000$   
 167 -> 174 0.70109

Excited State 8: Singlet-A 3.6548 eV 339.24 nm  $f=0.0000$   $\langle S^2 \rangle=0.000$   
 166 -> 174 0.69483

Excited State 9: Singlet-A 3.6689 eV 337.93 nm  $f=0.0171$   $\langle S^2 \rangle=0.000$   
 165 -> 174 0.69963

Excited State 10: Singlet-A 3.9388 eV 314.77 nm  $f=0.0000$   $\langle S^2 \rangle=0.000$   
 162 -> 174 -0.28737  
 164 -> 174 0.64142

Excited State 11: Singlet-A 3.9769 eV 311.76 nm  $f=0.0060$   $\langle S^2 \rangle=0.000$   
 161 -> 174 -0.25556  
 163 -> 174 0.65636

Excited State 12: Singlet-A 4.0065 eV 309.46 nm  $f=0.0000$   $\langle S^2 \rangle=0.000$   
 162 -> 174 0.64150  
 164 -> 174 0.29010

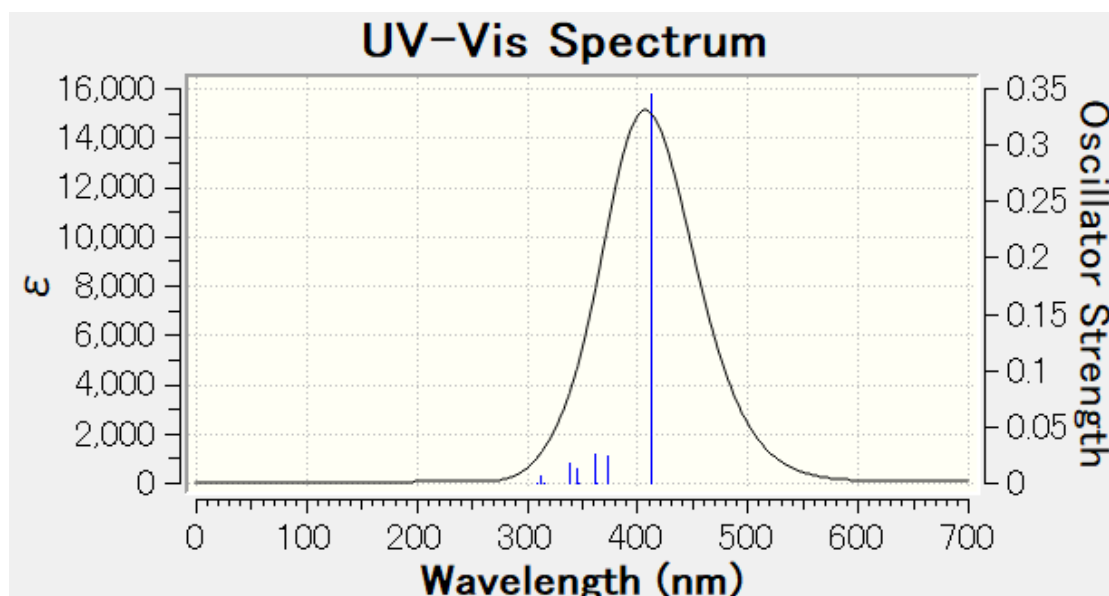

**Figure S21.** Simulated absorption spectrum (DCM) of **1**.

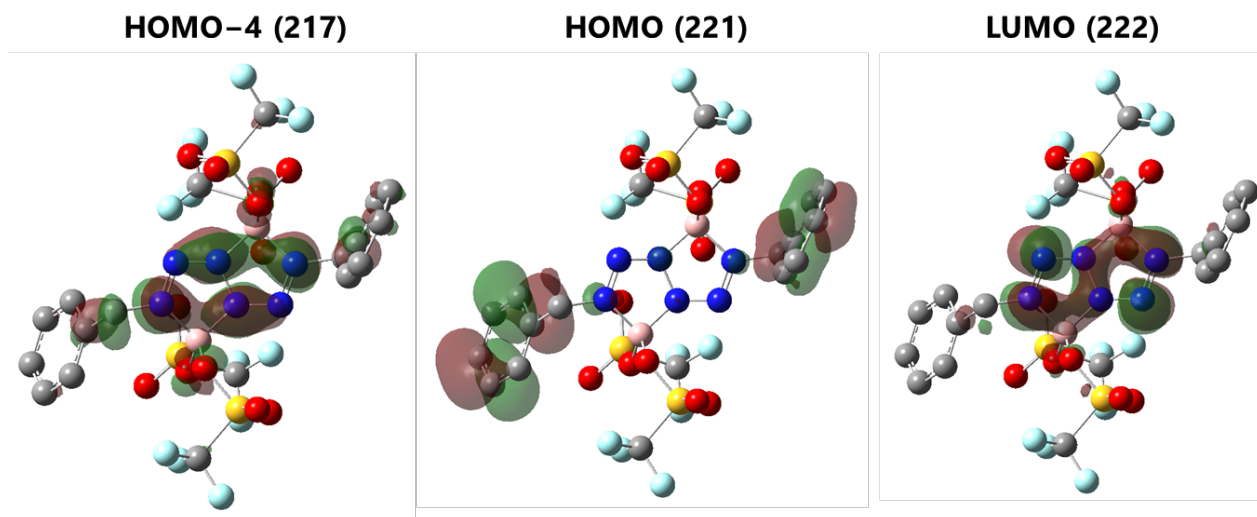

**Figure S22.** Calculated frontier orbitals of **2** (isovalue = 0.03)

**Table S3.** Calculated excitation energies and oscillator strengths for **2** at the B3LYP/6-31+G(d) level of theory.

Excited State 1: Singlet-A 2.7604 eV 449.15 nm  $f=0.1065$   $\langle S^2 \rangle=0.000$   
 219 -> 222 0.11095  
 220 -> 222 0.15766  
 221 -> 222 0.67816

This state for optimization and/or second-order correction.

Total Energy, E(TD-HF/TD-DFT) = -4766.01997516

Copying the excited state density for this state as the 1-particle RhoCI density.

Excited State 2: Singlet-A 2.7963 eV 443.39 nm  $f=0.0083$   $\langle S^2 \rangle=0.000$   
 219 -> 222 -0.18026  
 220 -> 222 0.66972  
 221 -> 222 -0.12620

Excited State 3: Singlet-A 2.8432 eV 436.07 nm  $f=0.0026$   $\langle S^2 \rangle=0.000$   
 219 -> 222 0.67309  
 220 -> 222 0.15415  
 221 -> 222 -0.14631

Excited State 4: Singlet-A 2.8764 eV 431.03 nm  $f=0.0013$   $\langle S^2 \rangle=0.000$   
 218 -> 222 0.70594

Excited State 5: Singlet-A 3.8436 eV 322.58 nm  $f=0.4243$   $\langle S^2 \rangle=0.000$   
 217 -> 222 0.70241

Excited State 6: Singlet-A 4.5574 eV 272.05 nm  $f=0.0009$   $\langle S^2 \rangle=0.000$

|            |          |
|------------|----------|
| 208 -> 222 | 0.11538  |
| 209 -> 222 | -0.11120 |
| 215 -> 222 | 0.25244  |
| 216 -> 222 | 0.29537  |
| 220 -> 223 | 0.14074  |
| 221 -> 223 | 0.52438  |

Excited State 7: Singlet-A 4.5781 eV 270.82 nm f=0.0051 <S\*\*2>=0.000

|            |          |
|------------|----------|
| 208 -> 222 | 0.14368  |
| 209 -> 222 | -0.14922 |
| 215 -> 222 | 0.39550  |
| 216 -> 222 | 0.18549  |
| 220 -> 223 | -0.36118 |
| 221 -> 223 | -0.31091 |

Excited State 8: Singlet-A 4.5973 eV 269.69 nm f=0.0211 <S\*\*2>=0.000

|            |          |
|------------|----------|
| 215 -> 222 | 0.16198  |
| 216 -> 222 | 0.10009  |
| 219 -> 223 | -0.14903 |
| 220 -> 223 | 0.56758  |
| 221 -> 223 | -0.31410 |

Excited State 9: Singlet-A 4.6542 eV 266.39 nm f=0.0040 <S\*\*2>=0.000

|            |          |
|------------|----------|
| 219 -> 223 | 0.68180  |
| 220 -> 223 | 0.13467  |
| 221 -> 223 | -0.10336 |

Excited State 10: Singlet-A 4.6855 eV 264.61 nm f=0.0008 <S\*\*2>=0.000

|            |         |
|------------|---------|
| 218 -> 223 | 0.70333 |
|------------|---------|

Excited State 11: Singlet-A 4.8960 eV 253.24 nm f=0.0026 <S\*\*2>=0.000

|            |          |
|------------|----------|
| 215 -> 222 | -0.37125 |
| 216 -> 222 | 0.54097  |
| 217 -> 223 | 0.16604  |
| 221 -> 223 | -0.10978 |

Excited State 12: Singlet-A 4.9692 eV 249.51 nm f=0.0026 <S\*\*2>=0.000

|            |          |
|------------|----------|
| 214 -> 222 | 0.67796  |
| 216 -> 222 | -0.13811 |

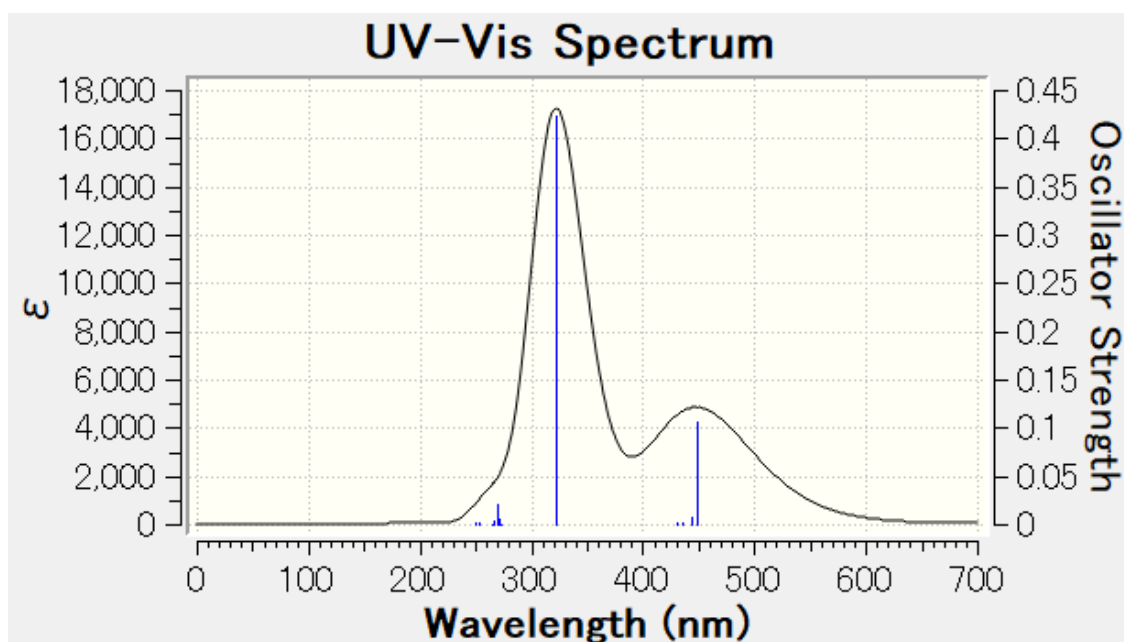

**Figure S23.** Simulated absorption spectrum (DCM) of **2**.

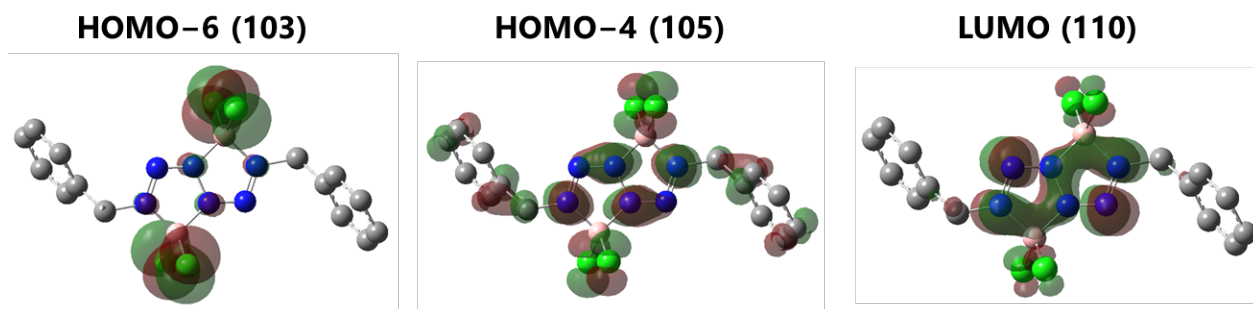

**Figure S24.** Calculated frontier orbitals of **3** (isovalue = 0.03)

**Table S4.** Calculated excitation energies and oscillator strengths for **3** at the B3LYP/6-31+G(d) level of theory.

Excited State 1: Singlet-AU 3.0206 eV 410.47 nm  $f=0.0377$   $\langle S^2 \rangle=0.000$   
 105  $\rightarrow$  110 -0.11155  
 107  $\rightarrow$  110 -0.14850  
 109  $\rightarrow$  110 0.67982

This state for optimization and/or second-order correction.

Total Energy, E(TD-HF/TD-DFT) = -2761.04289622

Copying the excited state density for this state as the 1-particle RhoCI density.

Excited State 2: Singlet-AG 3.0239 eV 410.02 nm  $f=0.0000$   $\langle S^2 \rangle=0.000$   
 106  $\rightarrow$  110 -0.14633  
 108  $\rightarrow$  110 0.68899

Excited State 3: Singlet-AU 3.1125 eV 398.34 nm  $f=0.0072$   $\langle S^2 \rangle=0.000$   
 107  $\rightarrow$  110 0.68912  
 109  $\rightarrow$  110 0.15076

Excited State 4: Singlet-AG 3.1185 eV 397.58 nm  $f=0.0000$   $\langle S^2 \rangle=0.000$   
 106  $\rightarrow$  110 0.69004  
 108  $\rightarrow$  110 0.14708

Excited State 5: Singlet-AU 3.4440 eV 360.00 nm  $f=0.3870$   $\langle S^2 \rangle=0.000$   
 105  $\rightarrow$  110 0.69270  
 109  $\rightarrow$  110 0.10979

Excited State 6: Singlet-AG 4.0697 eV 304.65 nm  $f=0.0000$   $\langle S^2 \rangle=0.000$   
 104  $\rightarrow$  110 0.70290

Excited State 7: Singlet-AU 4.1767 eV 296.85 nm  $f=0.0654$   $\langle S^2 \rangle=0.000$   
 103  $\rightarrow$  110 0.70240

Excited State 8: Singlet-AU 4.2704 eV 290.33 nm  $f=0.0002$   $\langle S^2 \rangle=0.000$   
101 ->110 0.69049

Excited State 9: Singlet-AG 4.3116 eV 287.56 nm  $f=0.0000$   $\langle S^2 \rangle=0.000$   
102 ->110 0.69548

Excited State 10: Singlet-AU 4.4991 eV 275.58 nm  $f=0.0189$   $\langle S^2 \rangle=0.000$   
100 ->110 0.69838

Excited State 11: Singlet-AG 4.5388 eV 273.17 nm  $f=0.0000$   $\langle S^2 \rangle=0.000$   
99 ->110 0.70037

Excited State 12: Singlet-AU 4.7863 eV 259.04 nm  $f=0.0105$   $\langle S^2 \rangle=0.000$   
98 ->110 0.70068

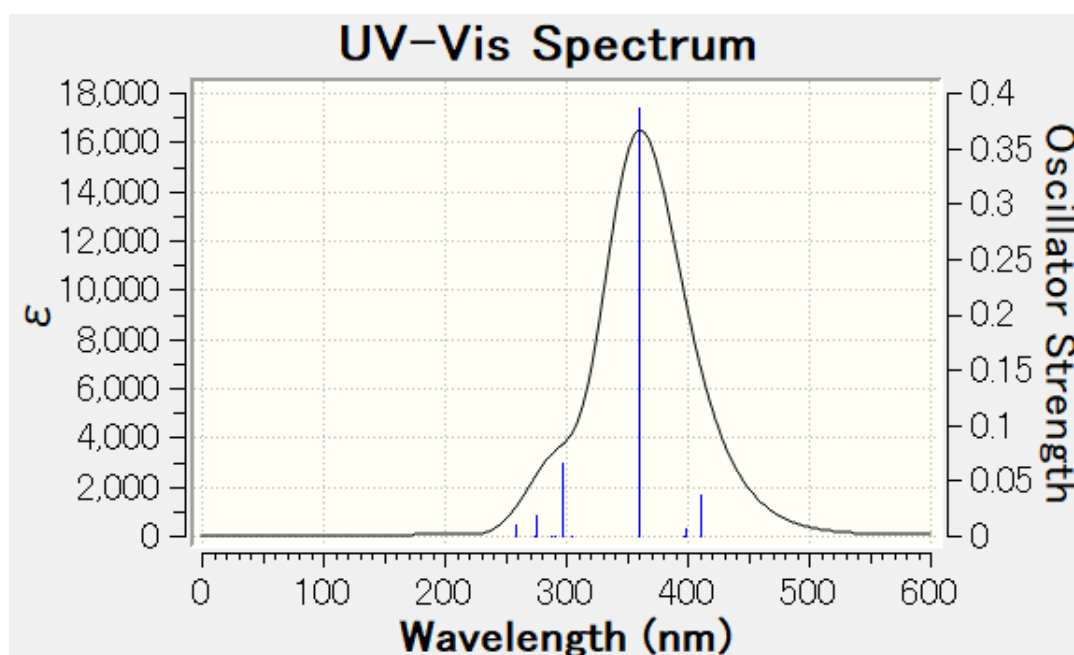

**Figure S25.** Simulated absorption spectrum (DCM) of **3**.

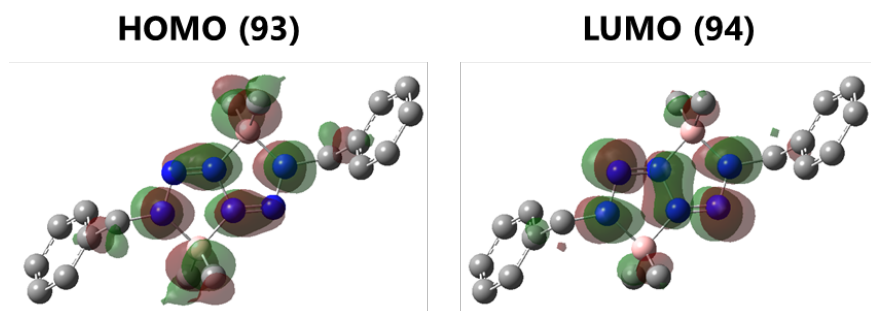

**Figure S26.** Calculated frontier orbitals of **4** (isovalue = 0.03)

**Table S5.** Calculated excitation energies and oscillator strengths for **4** at the B3LYP/6-31+G(d) level of theory.

|                                                                                   |            |           |           |          |              |
|-----------------------------------------------------------------------------------|------------|-----------|-----------|----------|--------------|
| Excited State 1:                                                                  | Singlet-AU | 3.1220 eV | 397.13 nm | f=0.5223 | <S**2>=0.000 |
| 93 -> 94                                                                          | 0.70563    |           |           |          |              |
| This state for optimization and/or second-order correction.                       |            |           |           |          |              |
| Total Energy, E(TD-HF/TD-DFT) = -1079.75436316                                    |            |           |           |          |              |
| Copying the excited state density for this state as the 1-particle RhoCI density. |            |           |           |          |              |
|                                                                                   |            |           |           |          |              |
| Excited State 2:                                                                  | Singlet-AG | 4.1849 eV | 296.27 nm | f=0.0000 | <S**2>=0.000 |
| 92 -> 94                                                                          | 0.69909    |           |           |          |              |
|                                                                                   |            |           |           |          |              |
| Excited State 3:                                                                  | Singlet-AU | 4.2341 eV | 292.82 nm | f=0.0168 | <S**2>=0.000 |
| 91 -> 94                                                                          | 0.70209    |           |           |          |              |
|                                                                                   |            |           |           |          |              |
| Excited State 4:                                                                  | Singlet-AG | 4.3540 eV | 284.76 nm | f=0.0000 | <S**2>=0.000 |
| 87 -> 94                                                                          | 0.10210    |           |           |          |              |
| 90 -> 94                                                                          | -0.15090   |           |           |          |              |
| 93 -> 95                                                                          | 0.67190    |           |           |          |              |
|                                                                                   |            |           |           |          |              |
| Excited State 5:                                                                  | Singlet-AG | 4.3873 eV | 282.60 nm | f=0.0000 | <S**2>=0.000 |
| 90 -> 94                                                                          | 0.68810    |           |           |          |              |
| 93 -> 95                                                                          | 0.14745    |           |           |          |              |
|                                                                                   |            |           |           |          |              |
| Excited State 6:                                                                  | Singlet-AU | 4.3893 eV | 282.47 nm | f=0.0019 | <S**2>=0.000 |
| 89 -> 94                                                                          | 0.70337    |           |           |          |              |
|                                                                                   |            |           |           |          |              |
| Excited State 7:                                                                  | Singlet-AU | 4.5378 eV | 273.22 nm | f=0.0040 | <S**2>=0.000 |
| 93 -> 96                                                                          | 0.70319    |           |           |          |              |
|                                                                                   |            |           |           |          |              |
| Excited State 8:                                                                  | Singlet-AG | 4.5810 eV | 270.65 nm | f=0.0000 | <S**2>=0.000 |
| 93 -> 97                                                                          | 0.69354    |           |           |          |              |

Excited State 9: Singlet-AU 4.7153 eV 262.94 nm  $f=0.0027$   $\langle S^2 \rangle=0.000$   
93 -> 98 0.70183

Excited State 10: Singlet-AG 4.8283 eV 256.79 nm  $f=0.0000$   $\langle S^2 \rangle=0.000$   
87 -> 94 0.15108  
93 -> 97 -0.10264  
93 -> 99 0.66613

Excited State 11: Singlet-AG 5.0072 eV 247.61 nm  $f=0.0000$   $\langle S^2 \rangle=0.000$   
88 -> 94 0.11167  
93 -> 100 0.67823

Excited State 12: Singlet-AU 5.0733 eV 244.39 nm  $f=0.0006$   $\langle S^2 \rangle=0.000$   
86 -> 94 0.69212

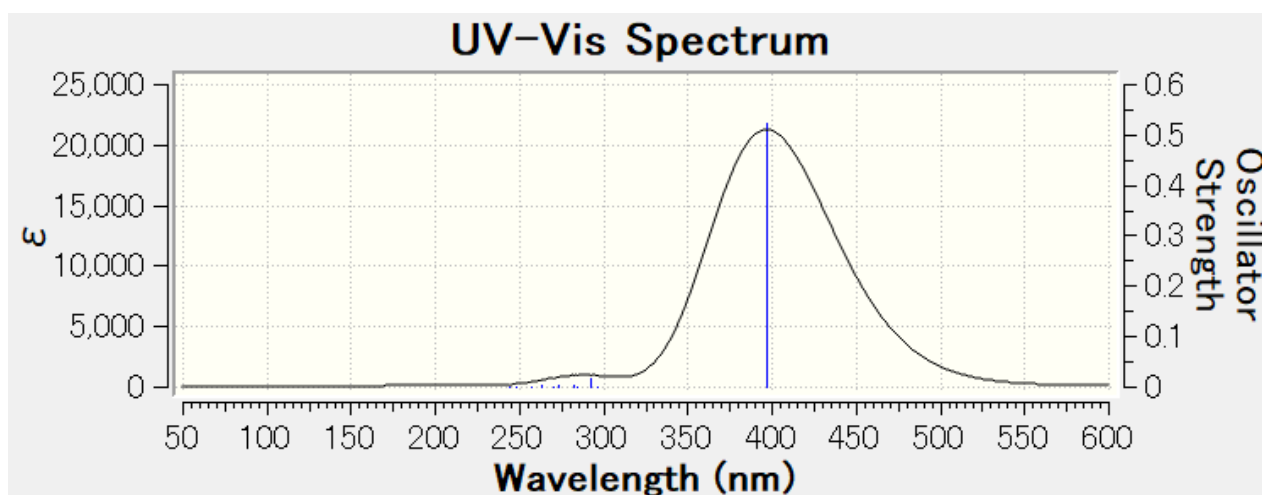

**Figure S27.** Simulated absorption spectrum (DCM) of **4**.



## 6. Study for the Stability of Compounds

Solutions of **2**, **3**, and **4** in  $\text{CDCl}_3$  were left under air at room temperature for three days, and no change of  $^1\text{H}$  NMR spectra was observed for any of the compounds. A drop of deionized water was added to solutions of **2**, **3**, and **4** in  $\text{CDCl}_3$ , and the mixtures were rigorously stirred at room temperature under air. After stirring for 8 h, the  $^1\text{H}$  NMR spectra of **3** and **4** showed no changes, whereas the solution of **2** exhibited new signals in the 5.2–5.5 ppm region, suggesting partial decomposition (**Figure S28**).

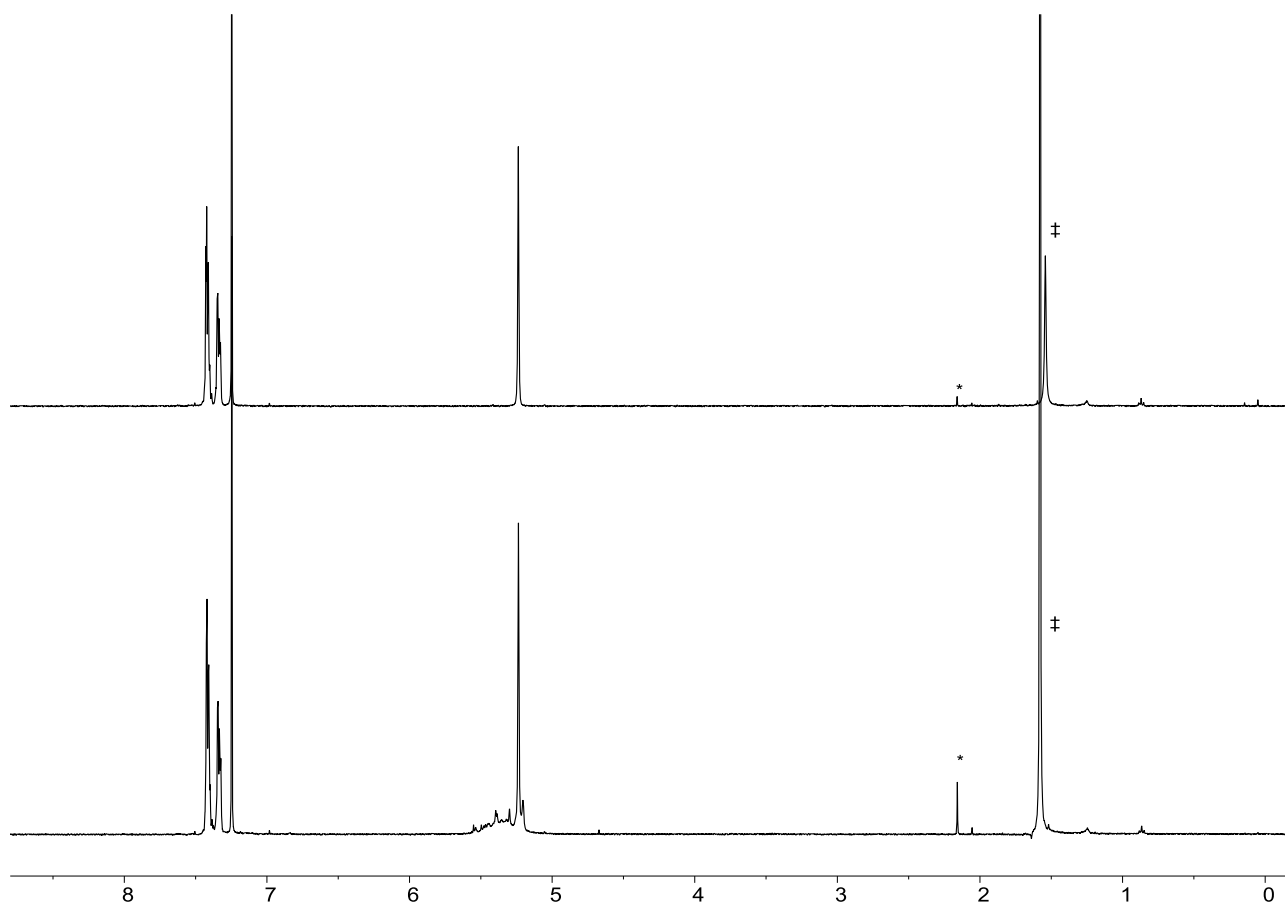

**Figure S28.**  $^1\text{H}$  NMR spectrum of **2** in  $\text{CDCl}_3$  and after 8 h at RT in the presence of  $\text{H}_2\text{O}$  (\*: acetone, ‡:  $\text{H}_2\text{O}$ ).

## 7. References

- 35 CrysAlisPRO, Oxford Diffraction/Agilent Technologies UK Ltd, Yarnton, England, (2015).
- 36 O. V. Dolomanov, Bourhis, L. J., Gildea, R. J., Howard, J. A. K. & Puschmann, H., *J. Appl. Cryst.*, 2009, **42**, 339–341.
- 37 C. A. Kabuto, S.; Kwon, E., *J. Cryst. Soc. Jpn.*, 2009, **51**, 218–224.
- 38 G. Sheldrick, *Act. Cryst. Sec. C*, 2015, **71**, 3–8.
- 39 M. J. Frisch, G. W. Trucks, H. B. Schlegel, G. E. Scuseria, M. A. Robb, J. R. Cheeseman, G. Scalmani, V. Barone, G. A. Petersson, H. Nakatsuji, X. Li, M. Caricato, A. V. Marenich, J. Bloino, B. G. Janesko, R. Gomperts, B. Mennucci, H. P. Hratchian, J. V. Ortiz, A. F. Izmaylov, J. L. Sonnenberg, Williams, F. Ding, F. Lipparini, F. Egidi, J. Goings, B. Peng, A. Petrone, T. Henderson, D. Ranasinghe, V. G. Zakrzewski, J. Gao, N. Rega, G. Zheng, W. Liang, M. Hada, M. Ehara, K. Toyota, R. Fukuda, J. Hasegawa, M. Ishida, T. Nakajima, Y. Honda, O. Kitao, H. Nakai, T. Vreven, K. Throssell, J. A. Montgomery Jr., J. E. Peralta, F. Ogliaro, M. J. Bearpark, J. J. Heyd, E. N. Brothers, K. N. Kudin, V. N. Staroverov, T. A. Keith, R. Kobayashi, J. Normand, K. Raghavachari, A. P. Rendell, J. C. Burant, S. S. Iyengar, J. Tomasi, M. Cossi, J. M. Millam, M. Klene, C. Adamo, R. Cammi, J. W. Ochterski, R. L. Martin, K. Morokuma, O. Farkas, J. B. Foresman, D. J. Fox, Gaussian 16, Revision C.01, ver. Wallingford, CT, 2016.
- 40 (a) C. Adamo, D. Jacquemin, *Chem. Soc. Rev.*, 2013, **42**, 845–856; (b) A. D. Laurent, C. Adamo, D. Jacquemin, *Phys. Chem. Chem. Phys.*, 2014, **16**, 14334–14356.
- 41 (a) C. Lee, W. Yang, R. G. Parr, *Phys. Rev. B*, 1988, **37**, 785–789; (b) A. D. Becke, *Phys. Rev. A*, 1988, **38**, 3098–3100; (c) B. Miehlich, A. Savin, H. Stoll, H. Preuss, *Chem. Phys. Lett.*, 1989, **157**, 200–206.
- 42 S. Huzinaga, J. Andzelm, M. Klobukowski, E. Radzio-Andzelm, Y. Sakai, H. Tatewaki, Gaussian basis sets for molecular calculations, Elsevier, 1984.
- 43 A. V. Marenich, C. J. Cramer, D. G. Truhlar, *J. Phys. Chem. B* 2009, **113**, 6378–6396.
- 44 (a) S. Grimme, J. Antony, S. Ehrlich, H. Krieg, *J. Chem. Phys.*, 2010, **132**, 154104.; (b) S. Grimme, S. Ehrlich, L. Goerigk, *J. Comput. Chem.*, 2011, **32**, 1456–1465.
